# Supplementary material
Source: PubMed Central journal article supplement (PMC8445173)
Supplement: iai.00024-21-s0001.pdf [file iai.00024-21-s0001.pdf]

1 **Supplementary Materials**

2 **PET Imaging of Translocator Protein as a Marker of Malaria-Associated Lung**  
3 **Inflammation**

4  
5 Julian L Goggi<sup>a</sup>; Carla Claser<sup>b,c</sup>; Siddesh V Hartimath<sup>a</sup>; Pei Xiang Hor<sup>d</sup>; Tan Peng Wen<sup>a</sup>;  
6 Boominathan Ramasamy<sup>a</sup>; Hussein Abdul Rahman<sup>a</sup>, Peter Cheng<sup>a</sup>; Zi Wei Chang<sup>b,d</sup>;  
7 Samantha Yee Teng Nguet<sup>d</sup>; Tang Jun Rong<sup>a</sup>; Edward G Robins<sup>a,e</sup>; Laurent Renia<sup>b,d</sup>

8 <sup>a</sup> Singapore Bioimaging Consortium, Agency for Science, Technology and Research  
9 (A\*STAR), 11 Biopolis Way, #01-02 Helios, Singapore 138667.

10 <sup>b</sup> Singapore Immunology Network, A\* STAR, 8A Biomedical Grove, Immunos, Singapore,  
11 138648

12 <sup>c</sup> Department of Parasitology, Institute of Biomedical Sciences, University of São  
13 Paulo, São Paulo - SP, Brazil.

14 <sup>d</sup> A\*STAR Infectious Diseases Laboratories, A\* STAR, 8A Biomedical Grove, Immunos,  
15 Singapore, 138648

16 <sup>e</sup> Clinical Imaging Research Centre, 14 Medical Drive, #B1-01, Yong Loo Lin School of  
17 Medicine, National University of Singapore, Singapore 117599.

18

19 \*Corresponding author:

20 Dr Julian Luke Goggi

21 [Julian\\_goggi@sbic.a-star.edu.sg](mailto:Julian_goggi@sbic.a-star.edu.sg)

22 Tel: +65 6478 8901

23 Fax: +65 6478 8908

24 Abbreviated title: Imaging of Malaria Associated Lung Inflammation.

25 Keywords: malaria, PET, lung, PbA, macrophages

26

27

| Antibody | Clone       | Fluorochrome    |
|----------|-------------|-----------------|
| CD45     | 30-F11      | APC-Cy7         |
| CD11b    | M1/70       | BV 650          |
| CD11c    | N418        | PE-Cy7          |
| CD24     | M1/69       | Pacblue         |
| CD64     | X54-5/7.1   | PE              |
| MHC II   | M5/114.15.2 | Alexa Fluor 700 |
| Ly6C     | HK1.4       | PerCP-Cy5.5     |
| F4/80    | BM8         | Biotin          |

29

30 **Supplementary Table 1: Antibodies used for Flow Cytometry**

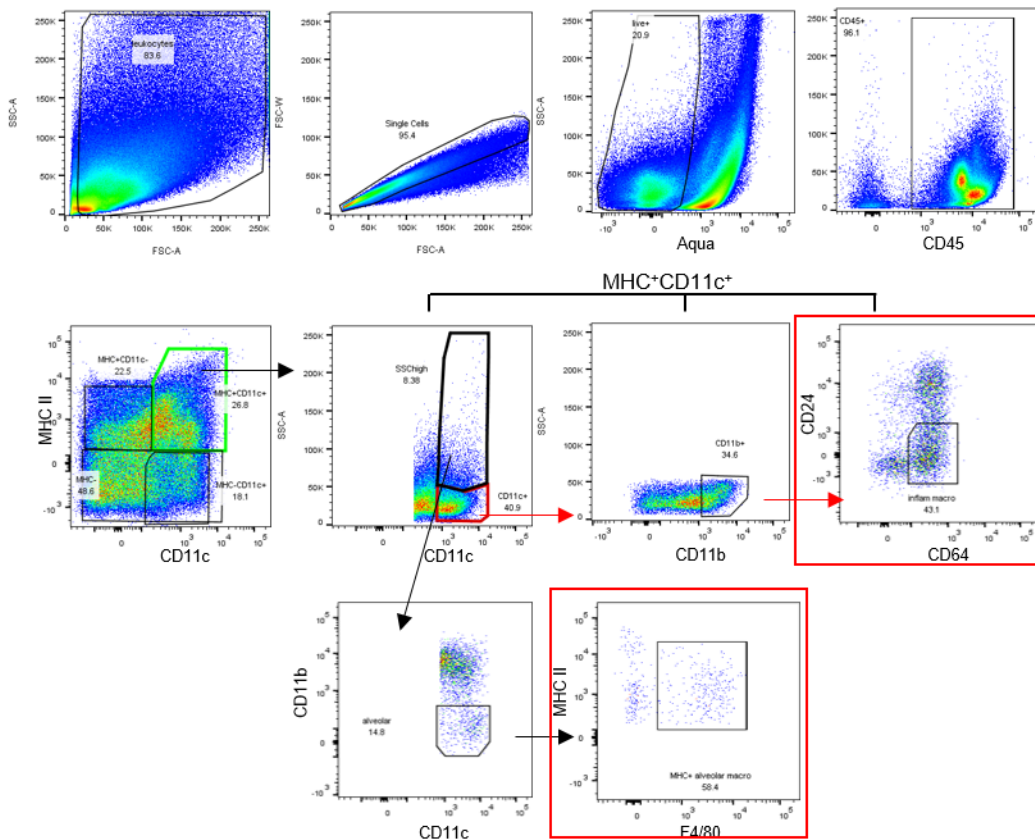

31

32 **Supplementary Figure 1.** Gating strategy used to analyse flow cytometry data of myeloid  
33 cells present in the lung tissue. Gating strategy for interstitial inflammatory macrophages and  
34 MHC II+ alveolar macrophages indicated by top and bottom red boxes respectively.
